# Supplementary material
Source: publisher figshare collection journal article supplement (https://sage.figshare.com/ndownloader/files/14375552)
Supplement: Supplementary file 1 [file 14375552]

## Appendix 1

### Domestic (U.S.) Cryptocurrency-Related Criminal Cases and International Cases Tried in the United States

| Cases                                                                           | Virtual Currency | Charges                                                                                                                                   | Outcome                                                                                                                                   |
|---------------------------------------------------------------------------------|------------------|-------------------------------------------------------------------------------------------------------------------------------------------|-------------------------------------------------------------------------------------------------------------------------------------------|
| 1. Thomas Costanzo<br>aka Morpheous<br>Titania<br><i>State: Arizona</i>         | bitcoin          | Money laundering/drug trafficking                                                                                                         | Sentenced to 41 months in prison                                                                                                          |
| 2. Jeremy Donagal<br>& eight other<br>defendants<br><i>State: California</i>    | bitcoin          | Manufacturing counterfeit prescription drugs, money laundering                                                                            | Sentenced 20 years in prison                                                                                                              |
| 3. Xzavyer Narvaez<br><i>State: California</i>                                  | bitcoin          | Stealing cryptocurrency by hijacking phone numbers.                                                                                       | Charged with seven counts of computer crimes, identity fraud, and grand theft.                                                            |
| 4. Theresa Lyn Tetley “Bitcoin Maven”<br><i>State: California</i>               | bitcoin          | Money laundered bitcoin from narcotics sales and ran an illegal bitcoin-for-cash exchange                                                 | Sentenced to 12 months and a day in prison, fined \$20,000 and given three years supervision after release                                |
| 5. Shaun Bridges<br><i>State: California</i>                                    | bitcoin          | Money laundering and obstruction of justice as Secret Service agent investigating Silk Road, as well as stealing Bitcoins worth \$800,000 | Sentenced to five years and nine months in federal prison; rearrested and convicted on additional charges, sentenced to another two years |
| 6. Precious Lanay Fitzgerald & Lawillie Joshua Hall<br><i>State: California</i> | bitcoin          | Defrauded the customers-second-degree robbery, child abuse, and grand theft second-degree robbery second-degree murder and robbery        | Charges filed                                                                                                                             |
| 7. Hacking of Game of Thrones<br><i>State: California</i>                       | bitcoin          | Ransom                                                                                                                                    | Paid \$250,000 in bitcoins                                                                                                                |
| 8. Hacking of Los Angeles Community College<br><i>State: California</i>         | bitcoin          | Ransom                                                                                                                                    | Paid \$28,000                                                                                                                             |

|                                                                                                |                                      |                                                                                                                                                                                                        |                                                                                                            |
|------------------------------------------------------------------------------------------------|--------------------------------------|--------------------------------------------------------------------------------------------------------------------------------------------------------------------------------------------------------|------------------------------------------------------------------------------------------------------------|
| 9. Bionic Coin, Sybrelabs Ltd., & Global Pay Net<br><i>State: Colorado</i>                     | bitcoin                              | Conducting fraudulent and unregistered business                                                                                                                                                        | Under investigation by ICO Taskforce                                                                       |
| 10. Dillon Michael Dean<br><i>State: Colorado</i>                                              | bitcoin                              | Fraudulent activities                                                                                                                                                                                  | US\$1.9 million in civil monetary penalties and restitution.                                               |
| 11. Bionic Coin, Sybrelabs Ltd., & Global Pay Net<br><i>State: Colorado</i>                    | bitcoin                              | Conducting fraudulent and unregistered business                                                                                                                                                        | Unknown/pending                                                                                            |
| 12. Homero Joshua Garza<br><i>State: Connecticut</i>                                           | bitcoin<br>PayCoin                   | Conducting unregistered securities and operating a Ponzi scheme.                                                                                                                                       | Statutory minimum of 21 months in a federal corrections facility, and judgment of more than US\$10 million |
| 13. Monique Delannoy-Jodoin & Beatriz Viruet<br><i>State: Connecticut</i>                      | Crowd Machine Computing Token (CMCT) | The dispute over bitcoins led to home invasion, first-degree robbery, and second-degree breach of peace.                                                                                               | Arrested                                                                                                   |
| 14. Pascal Reid Michell Abner Espinoza<br><i>State: Florida</i>                                | bitcoin                              | Money laundering and operating unlicensed money exchange business                                                                                                                                      | Charges dismissed                                                                                          |
| 15. Adolph Joseph<br><i>State: Florida</i>                                                     | bitcoin                              | Conspiring to import and distribute fentanyl and possession of a firearm by a convicted felon                                                                                                          | Sentenced to 10 years in federal prison                                                                    |
| 16. Mike Murgio<br><i>State: Florida</i>                                                       | bitcoin                              | Money laundering and working without a money transmitting license                                                                                                                                      | One year probation                                                                                         |
| 17. Gery Shalon-Israeli citizen (tried in the US)<br><br>Joshua Aaron<br><i>State: Florida</i> | bitcoin                              | Conspiracy to commit securities and wire fraud, on-line gambling, money laundering, and computer hacking<br><br>Conspiracy to commit securities and wire fraud, money laundering, and computer hacking | Sentenced to five years and five months in prison<br><br>Sentenced to five years and five months in prison |

|                                                                                                         |                    |                                                                                                                                            |                                                                                                            |
|---------------------------------------------------------------------------------------------------------|--------------------|--------------------------------------------------------------------------------------------------------------------------------------------|------------------------------------------------------------------------------------------------------------|
| Ziv Orenstein-<br>Israeli citizen (tried<br>in the United<br>States)                                    |                    | Conspiracy to commit<br>securities and wire fraud,<br>money laundering, and<br>computer hacking                                            | Sentenced to five years and<br>five months in prison                                                       |
| Anthony Murgio<br><i>State: Florida</i>                                                                 |                    | Conspiracy to commit<br>securities and wire fraud,<br>money laundering, and<br>computer hacking                                            | Sentenced to five years and<br>six months in prison                                                        |
| 18. Gal Vallerius<br>(a.k.a. Oxymonster)<br><i>Country: French–<br/>Israel</i><br><i>State: Georgia</i> | Cryptocu<br>rrency | Money laundering and<br>narcotics trafficking—Dream<br>Market.                                                                             | Tried in the United States;<br>sentenced to 20 years,<br>forfeits US\$700,000 in<br>Cryptocurrency         |
| 19. John Powell<br><i>State: Illinois</i>                                                               | bitcoin            | Operating an unlicensed<br>money service business.                                                                                         | Sentenced to four years in<br>federal prison                                                               |
| 20. Fletcher Robert<br>Childers &<br>Joseph Harris<br><i>State: Oklahoma</i>                            | CMCT               | Cryptocurrency theft worth<br>US\$14 million Charged with<br>grand theft, a first-degree<br>felony, and identity theft                     | Charges filed                                                                                              |
| 21. Joel Ortiz<br><i>State:<br/>Massachusetts</i>                                                       | bitcoin            | Hijacked 40 cell phone<br>numbers using a SIM<br>swapping technique                                                                        | Arrested                                                                                                   |
| 22. Sal Mansy<br><i>State: Michigan</i>                                                                 | bitcoin            | Trading without license                                                                                                                    | Sentenced to one year and<br>a day in prison and three<br>years of supervised release                      |
| 23. Morgan<br>Rockcoons<br><i>State: Nevada</i>                                                         | bitcoin            | Money laundering and<br>operating an unlicensed<br>money transmitting business                                                             | Under investigation                                                                                        |
| 24. Bryan Micon<br><i>State: Nevada</i>                                                                 | bitcoin            | Operating an unlicensed<br>interactive bitcoin gaming<br>system, “SealsWithClubs.”                                                         | Sentenced to probation and<br>a fine                                                                       |
| 25. Carl Mark<br>Force<br><i>State: New York</i>                                                        | bitcoin            | Money laundering,<br>obstruction of justice, and<br>extortion using the authority<br>as a DEA agent involved in<br>investigating Silk Road | Sentenced to six years and<br>five months in prison                                                        |
| 26. Louis Meza<br><i>State: New York</i>                                                                | Ethereum           | Charges with grand larceny,<br>kidnapping, robbery,<br>criminal use of firearm<br>demanding transfer of                                    | Under investigation<br>Was to be sentenced at the<br>end of September because<br>he pled guilty to second- |

|                                                                                                                            |         |                                                                                                                                                                                                                                                     |                                                                                                                                                                           |
|----------------------------------------------------------------------------------------------------------------------------|---------|-----------------------------------------------------------------------------------------------------------------------------------------------------------------------------------------------------------------------------------------------------|---------------------------------------------------------------------------------------------------------------------------------------------------------------------------|
|                                                                                                                            |         | US\$1.8 million worth of ether                                                                                                                                                                                                                      | degree kidnapping and first-degree grand larceny                                                                                                                          |
| 27. Charlie Shrem & Robert Faiella<br><i>State: New York</i>                                                               | bitcoin | <ul style="list-style-type: none"> <li>Sale of Bitcoins on Silk Road</li> <li>Money laundering and operating an unlicensed money transmitting business</li> </ul>                                                                                   | <ul style="list-style-type: none"> <li>Sentenced to two years in prison</li> <li>Sentenced to four years in prison</li> </ul>                                             |
| 28. Andrew Michael Jones-Virginia<br><br>Gary Davis-Ireland<br><br>Peter Phillip Nash-Australian<br><i>State: New York</i> | bitcoin | <p>Silk Road Site administrator</p> <p>Silk Road site administrator—conspiracy to distribute narcotics, money laundering, and computer hacking</p> <p>Silk Road Forum moderator: charged with narcotics conspiracy, money laundering conspiracy</p> | <p>Michael Jones pleads guilty-on house arrest</p> <p>Gary Davis plead not guilty-released on bail</p> <p>Peter Nash pleads guilty-in protective custody in Australia</p> |
| 29. Ross Ulbricht<br><i>State: New York</i>                                                                                | bitcoin | Engaging in a criminal enterprise and distributing narcotics online                                                                                                                                                                                 | Sentences to life in prison                                                                                                                                               |
| 30. Roger Thomas Clark (Canadian)<br><i>State: New York</i>                                                                | bitcoin | Silk Road advisor charged with a drug offense.                                                                                                                                                                                                      | A Canadian citizen in Thailand is extradited to the United States.                                                                                                        |
| 31 Yuri Lebedev<br><i>State: New York</i>                                                                                  | bitcoin | Operating unlawful bitcoin exchange                                                                                                                                                                                                                 | Sentenced to one year and three months in prison                                                                                                                          |
| 32, Trendon T. Shavers<br><i>State: New York</i>                                                                           | bitcoin | Running a Ponzi scheme                                                                                                                                                                                                                              | Sentenced to one year and five months in prison                                                                                                                           |
| 33. Trevon Gross<br><i>State: New York</i>                                                                                 | bitcoin | Obstructing examination of a financial institution                                                                                                                                                                                                  | Sentenced to five years and five months in prison, and \$12,000 fine                                                                                                      |
| 34. Dillon Michael Dean<br><i>State: New York</i>                                                                          | bitcoin | Illegal bitcoin investment program, Ponzi scheme                                                                                                                                                                                                    | Ordered to pay more than US\$1.9 million in civil monetary penalties and restitution                                                                                      |
| 35. Attorney T.J. Jesky and Mark F. DeStefano<br><i>State: New York</i>                                                    | bitcoin | Violated the registration provisions of the federal securities laws, selling millions in shares to UBI Blockchain Internet, Ltd.                                                                                                                    | Agreed to return US\$1.4 million, pay US\$188,682 in penalties, and subject to permanent injunctions                                                                      |
| 36. Patrick K. McDonnell and Cabbage Tech (Coin Drop Markets)                                                              | bitcoin | Engaged in fraudulent scheme, presenting Cabbage Tech as a successful firm.                                                                                                                                                                         | Will be required to pay: a fine of approximately US\$1,161,716, penalties of US\$871,287, and US\$290,429 in restitution                                                  |

|                                                                                                   |                         |                                                                                                                                                                                      |                                                                                                                                     |
|---------------------------------------------------------------------------------------------------|-------------------------|--------------------------------------------------------------------------------------------------------------------------------------------------------------------------------------|-------------------------------------------------------------------------------------------------------------------------------------|
| <i>State: New York</i>                                                                            |                         |                                                                                                                                                                                      |                                                                                                                                     |
| 37. Dominic Lacroix and Sabrina Paradis-Royer<br><i>State: New York</i>                           | Cryptocurrency—Plexcoin | Securities fraud—Launched million from their investors into an alleged crowdfunding, ignoring written mandates for a written accounting of assets                                    | Prohibiting from participating in any offering of digital securities and civil money penalties.                                     |
| 38. Jon Montroll “Ukyo”<br><i>State: New York</i>                                                 | bitcoin                 | Security fraud using stock exchange and provided fraudulent information to SEC during the investigation                                                                              | Plead guilty one count of security fraud and one count of obstruction of justice, expected to serve a maximum of 20 years in prison |
| 39. Cesar Guzman (Fuego), Allan Nunez (Joker), & Darrell Colon (Bishop)<br><i>State: New York</i> | Ether                   | Bronx Biker gang members charged with US\$2 million Ether heist                                                                                                                      | Charges filed; held on bail                                                                                                         |
| 40. Gelfman Blueprint, Inc.<br><i>State: New York</i>                                             | bitcoin                 | Fraudulent practices                                                                                                                                                                 | US\$2.5 million fine                                                                                                                |
| 41. Joseph P. Willner<br><i>State: New York</i>                                                   | bitcoin                 | Wire fraud, conspiracy to commit securities fraud and computer intrusion, and conspiracy to commit money laundering                                                                  | Charges filed                                                                                                                       |
| 42. Daniel Mercede<br><i>State: Ohio</i>                                                          | bitcoin                 | Stolen credit cards and money laundering                                                                                                                                             | Sentenced six years and two months in prison                                                                                        |
| 43. Fletcher Robert Childers & Joseph Harris<br><i>State: Oklahoma</i>                            | CMCT                    | Accused of swapping victim’s sim cars with fake sim card to steal phone number and identity                                                                                          | Arrested for grand theft, a first-degree felony, identity theft, and a class C misdemeanor                                          |
| 44. Ted Price<br><i>State: Pennsylvania</i>                                                       | bitcoin                 | Developing a malware program to divert bitcoins from other people’s wallet                                                                                                           | The case is under investigation                                                                                                     |
| 45. Joshua Sweet<br><i>State: Pennsylvania</i>                                                    | bitcoin                 | Money laundering through a drug trafficking scheme—online dark web drug business for alprazolam sold as Xanax, LSD, and other drug substances—laundered over US\$200,000 of bitcoin. | Charges filed                                                                                                                       |
| 46. Morgan Hunt & Kim Hecroft                                                                     | bitcoin                 | Misappropriation and solicitation of funds,                                                                                                                                          | Fine and restitution (US\$2.5 million)                                                                                              |

|                                                                  |                |                                                                                                                                                                                                                                    |                                                                                                                          |
|------------------------------------------------------------------|----------------|------------------------------------------------------------------------------------------------------------------------------------------------------------------------------------------------------------------------------------|--------------------------------------------------------------------------------------------------------------------------|
| <i>State: Texas</i>                                              |                | securities, or property cryptocurrency funds of bitcoin investment products' customers                                                                                                                                             |                                                                                                                          |
| 47. Jon Montroll<br>aka Ukyo<br><i>State: Texas</i>              | bitcoin        | Securities Fraud & obstruction of justice                                                                                                                                                                                          | Prosecuted in NY. Plead guilty to both charges. Each charge carries a maximum penalty of 20 years imprisonment           |
| 48. Ana Julia Lara<br><i>State: Texas</i>                        | Cryptocurrency | Coins Minter affiliate, created a fake email, and allegedly claim to be vice president of CoinTelegraph Media Group; also, accused of fabricating employees and a legitimate office using stock photos                             | The Texas State Securities Board issued an emergency action to cease and desist.                                         |
| Daniel Dishmon<br>and John Jason Woodard<br><i>State: Texas</i>  |                | Published advertisements for fraudulent investments targeting Texas residents; excessive returns also promised                                                                                                                     | The Texas State Securities Board issued an emergency action to of cease                                                  |
| 49. Digital Bank<br><i>State: Texas</i>                          | Cryptocurrency | Allegedly created an external wallet as "Photon Encrypted Ledger Key," and raised funds for an illegal ICO (initial coin offering). Investigators found proof of offered share issues for 2019, and utility coin issuance as DBGK. | Charged for misleading share members with multiple videos of President Obama describing the Photon Encrypted Ledger Key. |
| 450. Ali Shukri Amin<br><i>State: Virginia</i>                   | bitcoin        | Providing funds to ISIL and facilitating ISIL supporters                                                                                                                                                                           | Sentenced to 11 years and one month in prison                                                                            |
| 51. Steven Sadler<br>and Jenna White<br><i>State: Washington</i> | bitcoin        | Conspiracy to distribute illegal drugs on Silk Road                                                                                                                                                                                | Sentenced to five years in prison                                                                                        |

## Appendix 2

### International Cryptocurrency-Related Criminal Cases

| Cases                                                      | Virtual Currency                            | Charges                                                                     | Outcome                                         |
|------------------------------------------------------------|---------------------------------------------|-----------------------------------------------------------------------------|-------------------------------------------------|
| 1. Female (name unknown)<br><i>Country: Australia</i>      | bitcoin                                     | Drug trafficking                                                            | Unknown                                         |
| 2. Sindri Thor Stefansson<br><i>Country: Iceland</i>       | bitcoin                                     | Big Bitcoin Heist-worth\$2 million                                          | Extradition underway                            |
| 3. Unknown<br><i>Country: Brazil</i>                       | bitcoin                                     | Brazilian Crypto Investment Platform Atlas hacked                           | Unknown                                         |
| 4. 12 individuals<br><i>Country: Brazil</i>                | bitcoin                                     | Money laundering, and smuggling drugs                                       | Arrested                                        |
| 5. State officials<br><i>Country: Brazil</i>               | bitcoin                                     | Money laundering & fraud worth US\$22.4 million                             | Arrested                                        |
| 6. Unknown<br><i>Country: Canada</i>                       | bitcoin                                     | Hacking of computer files of indigenous tribes                              | Unknown                                         |
| 7. Unknown<br><i>Country: Canada</i>                       | bitcoin                                     | Midland, a Canadian paid ransom; hacking                                    | Unknown                                         |
| 8. Jason Arnold<br><i>Country: Canada</i>                  | Cryptocurrency                              | Theft of cryptocurrency worth US\$5.3 million.                              | Unknown                                         |
| 9. Alleged Silk Road drug dealer<br><i>Country: Canada</i> | bitcoin                                     | Drug dealer on Silk Road                                                    | Nine months in prison for trafficking marijuana |
| 10. Dominic Lacroix<br><i>Country: Canada</i>              | bitcoin                                     | Fraud charges-transferred US\$3.7 million worth of bitcoins                 | Arrested                                        |
| 11. Zhou<br><i>Country: China</i>                          | bitcoins. Ethereum & other cryptocurrencies | Hacking, theft of bitcoins and other cryptocurrencies worth US\$87 million. | Arrested                                        |

|                                                                           |                    |                                                                                                                       |                                   |
|---------------------------------------------------------------------------|--------------------|-----------------------------------------------------------------------------------------------------------------------|-----------------------------------|
| 12. Malware Developers (20 individuals)<br><i>Country: China</i>          | Cryptocurrency     | Hacking and illegal control of 389-million computers in China                                                         | Arrested                          |
| 13. Ma<br><i>Country: China</i>                                           | bitcoin & Ethereum | Electricity theft                                                                                                     | Arrested                          |
| 14. Two brothers<br><i>Country: Denmark</i>                               | bitcoin            | Bitcoin ransomware and infecting more than 1,000 computers                                                            | Community Service                 |
| 15. Unknown<br><i>Country: Denmark</i>                                    | bitcoin            | Dutch police arrested 10 people for money laundering and drug dealing worth US\$20 million                            | Unknown                           |
| 16. 10 individuals<br><i>Country: Dubai</i>                               | bitcoin            | Armed theft involving the purchase of bitcoin                                                                         | Arrested                          |
| 17. Employees at cryptocurrency trading platform<br><i>Country: Dubai</i> | bitcoin            | Embezzlement fraud                                                                                                    | Arrested                          |
| 18. Vinnik-BTC-e Administrator<br><i>Country: France</i>                  | bitcoin            | Cyber-attacks via his bitcoin platform and money laundering €133 million                                              | Extradition from Greece           |
| 19. A French security official<br><i>Country: France</i>                  | bitcoin            | State secrets-peddling economic information and falsifying administrative documents                                   | Indicted                          |
|                                                                           |                    |                                                                                                                       |                                   |
| 20. Two individuals<br><i>Country: Germany</i>                            | bitcoin            | Running the Darknet market, Hansa; abetting illegal drug sales, weapon trafficking and plagiarism of copyright goods. | Arrested and under investigation. |
| 21. Sathvik Viswanath, founder of Unocoin<br><i>Country: India</i>        | bitcoin            | Illegally operating the first bitcoin ATM in the world                                                                | Arrested                          |
| 22. Amit Bhardwaj, Hemant Bhope & Pankaj Adlakha<br><i>Country: India</i> | bitcoin            | Money laundering                                                                                                      | Confiscation of property          |
| 23. Nalin Kotadiya & Kirit Paladiya                                       | bitcoin            | Kidnapping                                                                                                            | Arrested                          |



|                                                                                       |                    |                                                                                           |                                   |
|---------------------------------------------------------------------------------------|--------------------|-------------------------------------------------------------------------------------------|-----------------------------------|
| <i>Country: India</i>                                                                 |                    |                                                                                           |                                   |
| 24. Nikhil Tiwari<br><i>Country: India</i>                                            | bitcoin            | Drug dealer busted for smuggling LSD from the dark web                                    | Arrested                          |
| 25. Divyesh Darji<br><i>Country: India</i>                                            | bitcoin            | Ponzi scheme                                                                              | Arrested                          |
| Unknown<br><i>Country: India</i>                                                      | bitcoin            | Theft of bitcoins from Coinsecure US\$3 million                                           | Unknown                           |
| 26. Indian police officer<br><i>Country: India</i>                                    | bitcoin            | Kidnapping & abduction                                                                    | Under investigation               |
| 27. Deepak<br><i>Country: India</i>                                                   | bitcoin            | Hacking & theft of bitcoin                                                                | In Custody                        |
| 28. Satyendra Kumar Singh, Investigator from Narcotic Bureau<br><i>Country: India</i> | bitcoin            | Theft of bitcoins that were frozen from a drug bust                                       | Arrested                          |
| 29. Five people (including two college students).<br><i>Country: India</i>            | bitcoin            | Trafficking of drugs—LSD                                                                  | Arrested                          |
| 30. Local Bitcoins Trader (a.k.a. BADASS20)<br><i>Country: Kenya</i>                  | bitcoin            | Money laundering and theft of funds; conspiracy to commit a felony                        | Charges filed                     |
| 31. Sindri Thor Stefansson<br><i>Country: Iceland</i>                                 | bitcoin & altcoins | Heist of 600 computers worth millions of dollars and used for mining bitcoin and altcoins | Arrested, escaped, and rearrested |
| 32. Git<br><i>Country: Israel</i>                                                     | bitcoin            | Money laundering; Ponzi scheme                                                            | Seized 1,071 Bitcoins; Arrested   |
| 33. Michael Kaydar<br><i>Country: Israel</i>                                          | bitcoin            | Making more than 100 hoax bomb threats; used bitcoin to buy Spoofcard (calling service)   | Arrested                          |
| 34. OneCoin<br><i>Country: Italy</i>                                                  | bitcoin            | Ponzi scheme; providing false information                                                 | Fine of €2,595,000                |
| 35. Unknown<br><i>Country: Japan</i>                                                  | bitcoin            | Hacking of Japanese cryptocurrency                                                        | Unknown                           |

|                                                                                |                |                                                                                                                              |                                                                                                                     |
|--------------------------------------------------------------------------------|----------------|------------------------------------------------------------------------------------------------------------------------------|---------------------------------------------------------------------------------------------------------------------|
|                                                                                |                | exchange Zaif; US\$530 million stolen                                                                                        |                                                                                                                     |
| 36. 16 individuals<br><i>Country: Japan</i>                                    | Monero         | Crypto jacking                                                                                                               | Arrested                                                                                                            |
| 37. Yuki Takenaka, Ripple exchange operator<br><i>Country: Japan</i>           | Ripple         | Fraud                                                                                                                        | Arrested                                                                                                            |
| 38. Mark Karpeles, CEO, Mt. Gox<br><i>Country: Japan</i>                       | bitcoin        | Bitcoin embezzlement of US\$1.85 billion                                                                                     | On trial                                                                                                            |
| 39. Unknown<br><i>Country: Japan</i>                                           | NEM coins      | Cryptocurrency theft- Hackers stole £380 million NEM coins from Japan's digital exchange Coincheck                           | Under investigation                                                                                                 |
| 40. Gregory David O'Neill<br><i>Country: New Zealand</i>                       | bitcoin        | Extortion and blackmail                                                                                                      | Sentenced to five years and seven months in prison                                                                  |
| 41. A couple from Poland<br><i>Country: Poland</i>                             | bitcoin        | Selling drugs, liquid LSD and DMT                                                                                            | Arrested in Portugal                                                                                                |
| 42. Alexander Vinnik, cryptocurrency exchange BTC-e-<br><i>Country: Russia</i> | bitcoin        | Money laundering; Helped launder hundreds of thousands of bitcoins stolen from infamous Tokyo-based bitcoin exchange Mt. Gox | Arrested in Greece; proceedings to extradite to the United States was rejected by Greece and will be sent to Russia |
| 43. Organizers of a cryptocurrency mining farm—RTI<br><i>Country: Russia</i>   | Cryptocurrency | Property damage & operating illegal cryptocurrency mining farm                                                               | Arrested                                                                                                            |
| 44. Unknown suspects<br><i>Country: Russia</i>                                 | bitcoin        | Pavel Nyashin, internet blogger and bitcoin holder, was beaten and robbed                                                    | Unknown                                                                                                             |
| 45. Nuclear scientist<br><i>Country: Russia</i>                                | bitcoin        | Infected water utility with cryptocurrency—mining malware                                                                    | Arrested                                                                                                            |
| 46. Gerard Boudoux & an accomplice<br><i>Country: Serbia</i>                   | bitcoin        | Fraud and belonging to organized crime network for defrauding a Singapore-based                                              | Charges filed, and the accomplice is on the run                                                                     |

|                                                                                |                    |                                                                                                                 |                                                                                                                                              |
|--------------------------------------------------------------------------------|--------------------|-----------------------------------------------------------------------------------------------------------------|----------------------------------------------------------------------------------------------------------------------------------------------|
|                                                                                |                    | South Korean businessman                                                                                        |                                                                                                                                              |
| 47. Unknown<br><i>Country: Slovenia</i>                                        | bitcoin            | Slovenian bitcoin mining marketplace NiceHash                                                                   | The company paid back 60% of stolen bitcoin worth US\$65 million                                                                             |
| 48. Five men<br><i>Country: South Africa</i>                                   | bitcoin            | Kidnap the victim, Liyaqat Parker, proprietor of South Africa's Foodworld; later released. Demanded 50 Bitcoins | Unknown                                                                                                                                      |
| 49. Go Yongsung<br><i>Country: South Korea</i>                                 | bitcoin            | Ponzi scheme: US\$38 million over a period of 24 months                                                         | Arrested                                                                                                                                     |
| 50. Unknown<br><i>Country: South Korea</i>                                     | Cryptocurrency     | Cryptocurrency exchange Coinrail suffers US\$40 Million theft                                                   | Unknown                                                                                                                                      |
| 51. Two suspects<br><i>Country: South Korea</i>                                | Ripple             | XRP phishing scam                                                                                               | Arrested                                                                                                                                     |
| 52. Unknown<br><i>Country: South Korea</i>                                     | bitcoin            | Businessman loses US\$2.3 million in bitcoin-Fiat P2P scam                                                      | Unknown                                                                                                                                      |
| 53. The operator of a child pornography website<br><i>Country: South Korea</i> | bitcoin            | Child pornography                                                                                               | Seizure of US\$1.4 million in bitcoin; sentenced to 18 months in prison and a penalty of 696 million South Korean currency won (US\$644,000) |
| 54. Jang<br><i>Country: South Korea</i>                                        | bitcoin            | Ponzi scheme worth US\$38 million                                                                               | Arrested                                                                                                                                     |
| 55. Unknown<br><i>Country: South Korea</i>                                     | bitcoin & Ethereum | Hacking: Bithumb, South Korea's largest bitcoin and Ethereum exchange                                           | Millions lost; status unknown                                                                                                                |
| 56. Unknown<br><i>Country: South Korea</i>                                     | bitcoin            | Hacking and Ransom: Web hosting company is paying over US\$1 million in bitcoin to extortionists                | Infected a total of 153 Linux servers along with customers' websites                                                                         |
| 57 Prinya Jaravijit, Television actor                                          | bitcoin            | Fraudulent scheme to defraud Finnish                                                                            | Arrested                                                                                                                                     |

|                                                                  |                                 |                                                                                                                                                                               |                                                                                                                                                                        |
|------------------------------------------------------------------|---------------------------------|-------------------------------------------------------------------------------------------------------------------------------------------------------------------------------|------------------------------------------------------------------------------------------------------------------------------------------------------------------------|
| Jiratisit Jaravijit<br>(a.k.a. Boom)<br><i>Country: Thailand</i> |                                 | national Aarni Otava<br>Saarimma out of<br>bitcoin worth US\$24<br>million<br>Conspiracy                                                                                      | Arrested, family's assets<br>worth US\$6.4 million<br>seized                                                                                                           |
| 58. Prasit Srisuwan<br><i>Country: Thailand</i>                  | bitcoin                         | Money laundering and<br>fraud worth US\$24<br>million                                                                                                                         | Indicted; entered a plea<br>of not guilty                                                                                                                              |
| 59. Unknown<br><i>Country: Thailand</i>                          | bitcoin                         | In Phuket, Thailand, a<br>Russian man was<br>blindfolded by<br>assailants demanding<br>transfer of US\$100,000<br>worth of bitcoins to an<br>online wallet                    | Under investigation                                                                                                                                                    |
| Alexandre Cazes<br><i>Country: Thailand</i>                      | bitcoin,<br>Monero,<br>Ethereum | Conspiracy to engage<br>in racketeering and<br>conspiracy to distribute<br>narcotics, distributing<br>narcotics, and<br>conspiracy to commit<br>fraud and money<br>laundering | Founder of Alpha Bay<br>arrested by Thai<br>authorities. Committed<br>suicide in Thai prison                                                                           |
| 61. Sergey Medvedec<br><i>Country: Russia</i>                    | bitcoin                         | Sale and dissemination<br>of stolen ids, debit and<br>credit card fraud,<br>financial and banking<br>fraud, and computer<br>malware                                           | Arrested in Thailand as<br>part of the Department<br>of Justice "In Fraud," a<br>dark web site case. He<br>was in possession of<br>100 million baht (Thai<br>currency) |
| 62. Gao Qitang &<br>Chen Yumin<br><i>Country: Taiwan</i>         | bitcoin                         | Attempted murder: The<br>two "Freshwater gang"<br>members shot a bitcoin<br>miner when he refused<br>to fulfill their original<br>contract                                    | Arrested                                                                                                                                                               |
| 63. Five members<br><i>Country: Turkey</i>                       | bitcoin                         | Kidnapping and<br>extortion of a<br>businessman                                                                                                                               | Stole bitcoins worth<br>about US\$3.54 million<br>Unknown status                                                                                                       |
| 64. Four individuals<br><i>Country: Ukraine</i>                  | Cryptocurrency                  | Cryptocurrency<br>exchange fraud                                                                                                                                              | Arrested                                                                                                                                                               |

|                                                                        |                                  |                                                                                                                                                                            |                                                                                                                                                  |
|------------------------------------------------------------------------|----------------------------------|----------------------------------------------------------------------------------------------------------------------------------------------------------------------------|--------------------------------------------------------------------------------------------------------------------------------------------------|
| 65. Unknown<br><i>Country: Ukraine</i>                                 | bitcoin                          | The kidnapping of EXMO Executive and ransom                                                                                                                                | \$1 million ransom in bitcoins<br>Unknown status                                                                                                 |
| 66. Grant West<br><i>Country: United Kingdom</i>                       | bitcoin                          | Hacking, fraud, and phishing scam                                                                                                                                          | Arrested, and £500,000 worth of bitcoins were seized                                                                                             |
| 67. Ryan Kennedy (a.k.a. Alex Green)<br><i>Country: United Kingdom</i> | bitcoin                          | Theft-Kennedy robbed the founder of Moolah and MintPal—two popular altcoin exchanges                                                                                       | Court hearing scheduled                                                                                                                          |
| 68. Unknown<br><i>Country: United Kingdom</i>                          | bitcoin                          | Robbery of two British bitcoin traders                                                                                                                                     | Unknown                                                                                                                                          |
| 69. Unknown<br><i>Country: United Kingdom</i>                          | bitcoin                          | An employee of UK-based bitcoin exchange was kidnaped in Ukraine. The assailants demanded US\$1 million worth of bitcoins and the employee was later released              | Under investigation                                                                                                                              |
| 70. Unknown<br><i>Country: United Kingdom</i>                          | Monero                           | Attack of government and other websites (about 4,000) by cryptocurrency mining software (i.e., crypto jacking attack)                                                      | Under investigation; attacks include U.S. court system, City University of New York, the city of Manchester, and government websites in England. |
| 71. Kurt Lai Lan<br><i>Country: United Kingdom</i>                     | bitcoin                          | Drug trafficking                                                                                                                                                           | England; sentenced to 16 years in prison                                                                                                         |
| 72. Thomas Jirikovsky<br><i>Country: Czech Republic</i>                | bitcoin                          | The operator of Sheepmarket Darknet, a Czech citizen, charged with trading illegal drugs and stealing bitcoins worth 16 million Czech Crowns (equivalent to UD\$ 624,0000) | Sentenced to nine years in prison                                                                                                                |
| 73. Lê Minh Tâm-CEO of Sky Mining                                      | Cryptocurrency-related equipment | Theft of 600 mining machines                                                                                                                                               | Unknown                                                                                                                                          |

|                         |  |  |  |
|-------------------------|--|--|--|
| <i>Country: Vietnam</i> |  |  |  |
|-------------------------|--|--|--|
